# Supplementary material for: Study on the Positive Regulation of Drought Tolerance by PdMYB2R032 Based on R2R3-MYB Gene Family Analysis in Populus deltoides
Source: Research Square preprint supplement (doi:10.21203/rs.3.rs-8045203/v1), 2025-12-08
Supplement: Supplementary file 1 [file 2b9c2ea2a9cd856634be8a78.xlsx]

## Sheet: Table S1
Table S1. Physicochemical property analysis of Pd2RMYB proteins
Sequence ID	Gene Name	Chr	Subgroup	Number of Amino Acid (aa)	Molecular Weight (Da)	Theoretical isoelectric point(pI)	Instability Index	Aliphatic Index	Grand Average of Hydropathicity
EVM00877.T1	Pd2RMYB1	Chr1	Group10	486	55066.2	5.95	49.13	65.8	-0.832
EVM01252.T1	Pd2RMYB2	Chr1	Group9	244	26553.3	9.22	36.68	80.66	-0.435
EVM01668.T1	Pd2RMYB3	Chr1	Group10	483	53338.8	6.4	46.09	61.61	-0.837
EVM01679.T1	Pd2RMYB4	Chr1	Group11	306	34215.3	9.31	51.41	57.75	-0.766
EVM01775.T1	Pd2RMYB5	Chr1	Group10	241	27013.4	9.1	51.57	58.67	-0.721
EVM01866.T1	Pd2RMYB6	Chr1	Group7	518	56649.1	5.86	52.48	63.28	-0.632
EVM01919.T1	Pd2RMYB7	Chr1	Group11	224	25892.7	6.32	59.56	60.49	-0.915
EVM02078.T1	Pd2RMYB8	Chr1	Group1	367	40789.7	6.27	66.27	77.6	-0.474
EVM02135.T1	Pd2RMYB9	Chr1	Group11	371	40311	6.68	64.22	63.37	-0.573
EVM02295.T1	Pd2RMYB10	Chr1	Group2	194	22475.6	8.91	61.38	73.45	-0.879
EVM02486.T1	Pd2RMYB11	Chr1	Group11	314	35138.3	9.24	48.78	83.54	-0.539
EVM02903.T1	Pd2RMYB12	Chr1	Group1	309	34915.1	5.39	59.23	70.71	-0.56
EVM03013.T1	Pd2RMYB13	Chr1	Group3	276	30876.8	8.94	46.73	72.86	-0.752
EVM03386.T2	Pd2RMYB14	Chr1	Group7	559	61793.5	4.95	59.07	66.35	-0.592
EVM03389.T1	Pd2RMYB15	Chr1	Group11	647	73650	8.89	64.32	67.65	-0.945
EVM04004.T1	Pd2RMYB16	Chr2	Group6	272	30935.8	5.87	53.49	74.56	-0.57
EVM04303.T1	Pd2RMYB17	Chr2	Group9	333	37855.8	9.31	70.3	57.12	-0.981
EVM04706.T1	Pd2RMYB18	Chr2	Group9	307	33348.4	9.18	59.54	71.21	-0.562
EVM04761.T1	Pd2RMYB19	Chr2	Group9	236	26117.1	8.65	49.79	63.26	-0.652
EVM04855.T1	Pd2RMYB20	Chr2	Group9	308	34755.3	5.78	68.7	67.44	-0.641
EVM05107.T1	Pd2RMYB21	Chr2	Group3	285	32165.3	9.02	51.5	73.54	-0.765
EVM05303.T1	Pd2RMYB22	Chr2	Group3	401	44356.5	5.14	58.38	72.19	-0.645
EVM05705.T1	Pd2RMYB23	Chr2	Group7	487	54061	6.77	53.58	59.53	-0.813
EVM06109.T1	Pd2RMYB24	Chr3	Group11	647	73632.7	8.33	65.61	69.57	-0.939
EVM06111.T2	Pd2RMYB25	Chr3	Group7	568	62265	5.03	55.88	64.98	-0.616
EVM06525.T1	Pd2RMYB26	Chr3	Group3	272	30799.6	9.08	48.8	77.46	-0.832
EVM06644.T2	Pd2RMYB27	Chr3	Group1	311	35036.2	5.53	57.38	72.12	-0.555
EVM06792.T1	Pd2RMYB28	Chr3	Group5	270	30646.6	5.26	52.73	78.78	-0.677
EVM07121.T1	Pd2RMYB29	Chr3	Group8	163	18269.2	5.38	44.79	60.49	-0.756
EVM08491.T1	Pd2RMYB30	Chr4	Group3	318	35797.2	8.6	50.89	69.94	-0.708
EVM08759.T1	Pd2RMYB31	Chr4	Group12	361	41803.3	9.32	60.25	61.58	-0.972
EVM08881.T1	Pd2RMYB32	Chr4	Group5	319	35880.3	5.09	55.25	72.13	-0.696
EVM10026.T1	Pd2RMYB33	Chr5	Group9	415	46509.6	7.34	53.77	67.86	-0.639
EVM10242.T1	Pd2RMYB34	Chr5	Group11	295	31454	6.63	46.28	63.8	-0.611
EVM10323.T1	Pd2RMYB35	Chr5	Group6	392	44755.8	6.38	48.48	69.11	-0.936
EVM10450.T1	Pd2RMYB36	Chr5	Group3	245	27861	9.29	41.72	74.08	-0.664
EVM10505.T1	Pd2RMYB37	Chr5	Group10	418	48497.6	5.68	61.77	70.67	-0.834
EVM10679.T1	Pd2RMYB38	Chr5	Group9	343	37093.6	8.24	47.92	65.95	-0.645
EVM11033.T1	Pd2RMYB39	Chr5	Group9	334	37811	9.32	64.28	63.41	-0.841
EVM11669.T1	Pd2RMYB40	Chr6	Group2	303	34059	5.71	47.01	70.2	-0.695
EVM11990.T1	Pd2RMYB41	Chr6	Group7	302	32928.1	5.63	55.78	73.97	-0.336
EVM12092.T1	Pd2RMYB42	Chr6	Group2	289	32626.8	8.37	54.87	74.67	-0.754
EVM12097.T1	Pd2RMYB43	Chr6	Group2	198	22763.7	9.24	66.55	67.02	-0.892
EVM13085.T1	Pd2RMYB44	Chr6	Group11	307	34785.8	7.7	50.44	61.95	-0.851
EVM13182.T2	Pd2RMYB45	Chr6	Group12	369	42700.7	9.36	63.55	68.48	-0.954
EVM13939.T1	Pd2RMYB46	Chr7	Group9	247	28931.4	8.79	67.49	60.04	-0.967
EVM14261.T1	Pd2RMYB47	Chr7	Group5	341	37803.8	6.35	56.09	81	-0.463
EVM14401.T1	Pd2RMYB48	Chr7	Group11	296	31492	6.7	45.47	60.68	-0.652
EVM14515.T1	Pd2RMYB49	Chr7	Group11	240	26638.5	8.78	61.32	56.17	-0.871
EVM14632.T1	Pd2RMYB50	Chr7	Group9	309	32921.4	5.5	54.5	60.58	-0.611
EVM14971.T1	Pd2RMYB51	Chr7	Group7	343	38110.8	6.24	63.08	69.71	-0.567
EVM15535.T1	Pd2RMYB52	Chr8	Group6	282	32181.1	5.72	64.84	68.44	-0.738
EVM15679.T1	Pd2RMYB53	Chr8	Group10	458	51738.8	6.55	58.81	68.8	-0.783
EVM15850.T1	Pd2RMYB54	Chr8	Group1	221	24928.3	8.78	51.86	83.94	-0.745
EVM16331.T1	Pd2RMYB55	Chr8	Group9	257	28101.6	8.58	47.43	74.32	-0.609
EVM16390.T1	Pd2RMYB56	Chr8	Group11	292	33039.2	6.72	50.17	72.12	-0.614
EVM16399.T1	Pd2RMYB57	Chr8	Group9	412	44665.7	5.72	54.25	62.28	-0.685
EVM16763.T1	Pd2RMYB58	Chr8	Group11	221	25065.8	6.24	61.62	64.48	-0.782
EVM17528.T1	Pd2RMYB59	Chr9	Group9	244	26665	6.61	40.93	72.7	-0.623
EVM17839.T1	Pd2RMYB60	Chr9	Group1	332	37049.6	5.26	59.48	67.59	-0.606
EVM17924.T1	Pd2RMYB61	Chr9	Group10	484	53679.1	5.88	48.92	57.85	-0.87
EVM17936.T3	Pd2RMYB62	Chr9	Group11	308	34615.6	9.3	53.62	54.84	-0.833
EVM18046.T1	Pd2RMYB63	Chr9	Group10	191	21519.3	4.5	51.54	59.21	-0.43
EVM18955.T1	Pd2RMYB64	Chr10	Group10	514	57596.3	6.52	48.44	81.21	-0.52
EVM19173.T1	Pd2RMYB65	Chr10	Group4	316	35807.2	6.12	65.65	71.93	-0.648
EVM19384.T1	Pd2RMYB66	Chr10	Group4	316	35817.6	5.8	50.76	62.37	-0.716
EVM19507.T1	Pd2RMYB67	Chr10	Group9	449	49868.3	6.51	62.26	53.7	-0.672
EVM19704.T1	Pd2RMYB68	Chr10	Group11	293	33521.7	6.32	43.45	68.87	-0.694
EVM20064.T1	Pd2RMYB69	Chr10	Group11	234	26360.3	6.71	52.48	60.85	-0.817
EVM20463.T1	Pd2RMYB70	Chr11	Group8	272	30897.2	5.6	42.52	58.46	-0.874
EVM21488.T1	Pd2RMYB71	Chr12	Group11	295	32158.4	7	52.47	66.14	-0.549
EVM21529.T1	Pd2RMYB72	Chr12	Group4	327	37279	7.7	68.29	66.85	-0.675
EVM21645.T1	Pd2RMYB73	Chr12	Group9	243	28775	6.87	70.21	53.42	-1.066
EVM22444.T1	Pd2RMYB74	Chr12	Group10	428	48235	6.24	52.47	62.38	-0.727
EVM22879.T1	Pd2RMYB75	Chr13	Group7	633	68912.9	5.62	54.53	68.63	-0.581
EVM22988.T1	Pd2RMYB76	Chr13	Group8	256	29310.4	4.67	55.36	60.66	-0.815
EVM23450.T1	Pd2RMYB77	Chr13	Group11	1070	119343	5.2	53.61	76.64	-0.798
EVM23622.T1	Pd2RMYB78	Chr13	Group9	394	44006.9	8.22	50.91	60.15	-0.773
EVM23626.T1	Pd2RMYB79	Chr13	Group5	323	36501.8	6.13	45.66	66.72	-0.769
EVM23859.T1	Pd2RMYB80	Chr14	Group9	311	35169.9	5.55	71.89	69.23	-0.636
EVM23996.T1	Pd2RMYB81	Chr14	Group9	311	33650.9	8.84	57.47	74.98	-0.481
EVM24082.T1	Pd2RMYB82	Chr14	Group9	248	27367.2	6.98	59.36	62.94	-0.742
EVM24242.T1	Pd2RMYB83	Chr14	Group9	311	35185.9	5.55	71.51	70.48	-0.618
EVM24415.T1	Pd2RMYB84	Chr14	Group8	493	55240.7	8.99	46.92	63.04	-0.947
EVM25452.T1	Pd2RMYB85	Chr15	Group5	296	32877.2	6.55	45.28	73.48	-0.511
EVM25918.T1	Pd2RMYB86	Chr15	Group10	452	51150.5	5.79	49.48	70.07	-0.684
EVM26249.T1	Pd2RMYB87	Chr15	Group9	236	28044.4	7.71	65.25	62.84	-0.944
EVM26760.T1	Pd2RMYB88	Chr16	Group11	307	34558.7	9.01	52.23	59.74	-0.805
EVM28102.T1	Pd2RMYB89	Chr17	Group12	362	41241.9	9.31	59.07	67.65	-0.849
EVM28299.T1	Pd2RMYB90	Chr17	Group5	399	43588.4	6.32	49.1	67.27	-0.693
EVM28306.T1	Pd2RMYB91	Chr17	Group9	436	48620.6	8.42	58.53	60.44	-0.59
EVM28325.T1	Pd2RMYB92	Chr17	Group5	322	35716	6.91	51.08	68.23	-0.666
EVM28977.T1	Pd2RMYB93	Chr17	Group9	140	16465.7	10.09	63.85	67.64	-0.961
EVM29109.T1	Pd2RMYB94	Chr18	Group2	423	47231.2	5.84	49.05	60.5	-0.899
EVM30315.T1	Pd2RMYB95	Chr19	Group3	318	35564.9	8.86	47.34	68.43	-0.671
EVM30470.T1	Pd2RMYB96	Chr19	Group8	263	30264.7	5.21	54.23	63	-0.793
EVM31016.T1	Pd2RMYB97	Chr19	Group9	381	42571.7	8.84	52.09	62.7	-0.714
EVM31193.T1	Pd2RMYB98	Chr19	Group11	1019	114525	5.27	51.12	75.6	-0.836
EVM31395.T1	Pd2RMYB99	Chr19	Group5	325	37058.2	5.96	48.68	62.15	-0.876
EVM31490.T1	Pd2RMYB100	JACEGQ020000198.1	Group3	271	30116.2	8.59	43.61	76.68	-0.542
Mean value				350.72	39300	7.097	54.8383	67.2168	-0.72085

## Sheet: Table S2
Table S2. Subcellular localization prediction of Pd2RMYB proteins
Gene Name	Result	WoLFPSORT	CELLO	BUSCA
Pd2RMYB1	nucleus	nucleus	nucleus	nucleus
Pd2RMYB2	nucleus	nucleus	Mitochondrial	nucleus
Pd2RMYB3	nucleus	nucleus	nucleus	nucleus
Pd2RMYB4	nucleus	nucleus	nucleus	nucleus
Pd2RMYB5	nucleus	nucleus	nucleus	nucleus
Pd2RMYB6	nucleus	nucleus	nucleus	nucleus
Pd2RMYB7	nucleus	nucleus	nucleus	nucleus
Pd2RMYB8	nucleus	nucleus	nucleus	nucleus
Pd2RMYB9	chloroplast	chloroplast	nucleus	chloroplast
Pd2RMYB10	nucleus	nucleus	nucleus	nucleus
Pd2RMYB11	nucleus	nucleus	Chloroplast	nucleus
Pd2RMYB12	nucleus	nucleus	nucleus	nucleus
Pd2RMYB13	nucleus	nucleus	nucleus	nucleus
Pd2RMYB14	nucleus	nucleus	nucleus	nucleus
Pd2RMYB15	nucleus	nucleus	nucleus	nucleus
Pd2RMYB16	nucleus	nucleus	nucleus	nucleus
Pd2RMYB17	nucleus	nucleus	nucleus	nucleus
Pd2RMYB18	nucleus	nucleus	nucleus	nucleus
Pd2RMYB19	nucleus	nucleus	nucleus	nucleus
Pd2RMYB20	nucleus	nucleus	nucleus	nucleus
Pd2RMYB21	nucleus	nucleus	nucleus	nucleus
Pd2RMYB22	nucleus	nucleus	nucleus	nucleus
Pd2RMYB23	nucleus	nucleus	nucleus	nucleus
Pd2RMYB24	nucleus	cytoplasmic	nucleus	nucleus
Pd2RMYB25	nucleus	nucleus	nucleus	nucleus
Pd2RMYB26	nucleus	nucleus	nucleus	nucleus
Pd2RMYB27	nucleus	nucleus	nucleus	nucleus
Pd2RMYB28	nucleus	nucleus	nucleus	nucleus
Pd2RMYB29	nucleus	nucleus	nucleus	nucleus
Pd2RMYB30	nucleus	nucleus	nucleus	nucleus
Pd2RMYB31	nucleus	nucleus	nucleus	nucleus
Pd2RMYB32	nucleus	nucleus	nucleus	nucleus
Pd2RMYB33	nucleus	nucleus	nucleus	nucleus
Pd2RMYB34	nucleus	nucleus	nucleus	nucleus
Pd2RMYB35	nucleus	nucleus	nucleus	nucleus
Pd2RMYB36	nucleus	nucleus	nucleus	nucleus
Pd2RMYB37	nucleus	nucleus	nucleus	nucleus
Pd2RMYB38	nucleus	nucleus	nucleus	nucleus
Pd2RMYB39	nucleus	nucleus	nucleus	nucleus
Pd2RMYB40	nucleus	nucleus	nucleus	nucleus
Pd2RMYB41	nucleus	nucleus	nucleus	nucleus
Pd2RMYB42	nucleus	nucleus	nucleus	nucleus
Pd2RMYB43	nucleus	nucleus	nucleus	nucleus
Pd2RMYB44	nucleus	nucleus	nucleus	nucleus
Pd2RMYB45	nucleus	nucleus	nucleus	nucleus
Pd2RMYB46	nucleus	nucleus	nucleus	nucleus
Pd2RMYB47	nucleus	nucleus	nucleus	nucleus
Pd2RMYB48	nucleus	nucleus	nucleus	nucleus
Pd2RMYB49	nucleus	nucleus	nucleus	nucleus
Pd2RMYB50	nucleus	nucleus	nucleus	nucleus
Pd2RMYB51	nucleus	nucleus	nucleus	nucleus
Pd2RMYB52	nucleus	nucleus	nucleus	nucleus
Pd2RMYB53	nucleus	nucleus	nucleus	nucleus
Pd2RMYB54	nucleus	nucleus	nucleus	nucleus
Pd2RMYB55	nucleus	nucleus	nucleus	nucleus
Pd2RMYB56	nucleus	nucleus	nucleus	nucleus
Pd2RMYB57	nucleus	nucleus	nucleus	nucleus
Pd2RMYB58		chloroplast	Cytoplasmic	nucleus
Pd2RMYB59	nucleus	nucleus	nucleus	nucleus
Pd2RMYB60	nucleus	nucleus	nucleus	nucleus
Pd2RMYB61	nucleus	nucleus	nucleus	nucleus
Pd2RMYB62	nucleus	nucleus	nucleus	nucleus
Pd2RMYB63	nucleus	nucleus	Chloroplast	nucleus
Pd2RMYB64	nucleus	nucleus	nucleus	nucleus
Pd2RMYB65	nucleus	nucleus	nucleus	nucleus
Pd2RMYB66	nucleus	nucleus	nucleus	nucleus
Pd2RMYB67	nucleus	nucleus	nucleus	chloroplast
Pd2RMYB68	nucleus	nucleus	nucleus	nucleus
Pd2RMYB69	nucleus	pero	nucleus	nucleus
Pd2RMYB70	nucleus	nucleus	nucleus	nucleus
Pd2RMYB71	nucleus	nucleus	nucleus	nucleus
Pd2RMYB72	nucleus	nucleus	nucleus	nucleus
Pd2RMYB73	nucleus	nucleus	nucleus	nucleus
Pd2RMYB74	nucleus	nucleus	nucleus	nucleus
Pd2RMYB75	nucleus	nucleus	nucleus	nucleus
Pd2RMYB76	nucleus	nucleus	nucleus	nucleus
Pd2RMYB77	nucleus	nucleus	nucleus	nucleus
Pd2RMYB78	nucleus	nucleus	nucleus	nucleus
Pd2RMYB79	nucleus	nucleus	nucleus	nucleus
Pd2RMYB80	nucleus	nucleus	nucleus	nucleus
Pd2RMYB81	nucleus	nucleus	nucleus	nucleus
Pd2RMYB82	nucleus	nucleus	nucleus	nucleus
Pd2RMYB83	nucleus	nucleus	nucleus	nucleus
Pd2RMYB84	nucleus	nucleus	nucleus	nucleus
Pd2RMYB85	nucleus	nucleus	nucleus	nucleus
Pd2RMYB86	nucleus	nucleus	nucleus	nucleus
Pd2RMYB87	nucleus	nucleus	nucleus	nucleus
Pd2RMYB88	nucleus	nucleus	nucleus	nucleus
Pd2RMYB89	nucleus	nucleus	nucleus	nucleus
Pd2RMYB90	nucleus	nucleus	nucleus	nucleus
Pd2RMYB91	nucleus	nucleus	nucleus	nucleus
Pd2RMYB92	nucleus	nucleus	nucleus	nucleus
Pd2RMYB93	nucleus	nucleus	nucleus	chloroplast
Pd2RMYB94	nucleus	nucleus	nucleus	nucleus
Pd2RMYB95	nucleus	nucleus	nucleus	nucleus
Pd2RMYB96	nucleus	nucleus	nucleus	nucleus
Pd2RMYB97	nucleus	nucleus	nucleus	nucleus
Pd2RMYB98	nucleus	nucleus	nucleus	nucleus
Pd2RMYB99	nucleus	nucleus	nucleus	nucleus
Pd2RMYB100	nucleus	nucleus	nucleus	nucleus

## Sheet: Table S3
Table S3. Pd2RMYB gene pairs with collinearity
Pair1	Pair2	DuplicateType
Pd2RMYB1	Pd2RMYB86	WGD/segmental
Pd2RMYB2	Pd2RMYB18	WGD/segmental
Pd2RMYB2	Pd2RMYB38	WGD/segmental
Pd2RMYB2	Pd2RMYB59	WGD/segmental
Pd2RMYB2	Pd2RMYB81	WGD/segmental
Pd2RMYB3	Pd2RMYB61	WGD/segmental
Pd2RMYB4	Pd2RMYB44	WGD/segmental
Pd2RMYB4	Pd2RMYB56	WGD/segmental
Pd2RMYB4	Pd2RMYB62	WGD/segmental
Pd2RMYB4	Pd2RMYB68	WGD/segmental
Pd2RMYB4	Pd2RMYB88	WGD/segmental
Pd2RMYB5	Pd2RMYB63	WGD/segmental
Pd2RMYB12	Pd2RMYB27	WGD/segmental
Pd2RMYB13	Pd2RMYB21	WGD/segmental
Pd2RMYB13	Pd2RMYB26	WGD/segmental
Pd2RMYB14	Pd2RMYB25	WGD/segmental
Pd2RMYB15	Pd2RMYB24	WGD/segmental
Pd2RMYB16	Pd2RMYB52	WGD/segmental
Pd2RMYB17	Pd2RMYB33	WGD/segmental
Pd2RMYB17	Pd2RMYB39	WGD/segmental
Pd2RMYB18	Pd2RMYB38	WGD/segmental
Pd2RMYB18	Pd2RMYB50	WGD/segmental
Pd2RMYB18	Pd2RMYB59	WGD/segmental
Pd2RMYB18	Pd2RMYB81	WGD/segmental
Pd2RMYB19	Pd2RMYB82	WGD/segmental
Pd2RMYB20	Pd2RMYB83	WGD/segmental
Pd2RMYB20	Pd2RMYB80	WGD/segmental
Pd2RMYB21	Pd2RMYB26	WGD/segmental
Pd2RMYB30	Pd2RMYB95	WGD/segmental
Pd2RMYB31	Pd2RMYB89	WGD/segmental
Pd2RMYB33	Pd2RMYB39	WGD/segmental
Pd2RMYB34	Pd2RMYB48	WGD/segmental
Pd2RMYB38	Pd2RMYB50	WGD/segmental
Pd2RMYB38	Pd2RMYB59	WGD/segmental
Pd2RMYB38	Pd2RMYB81	WGD/segmental
Pd2RMYB40	Pd2RMYB94	WGD/segmental
Pd2RMYB44	Pd2RMYB62	WGD/segmental
Pd2RMYB44	Pd2RMYB68	WGD/segmental
Pd2RMYB44	Pd2RMYB88	WGD/segmental
Pd2RMYB46	Pd2RMYB93	WGD/segmental
Pd2RMYB50	Pd2RMYB59	WGD/segmental
Pd2RMYB50	Pd2RMYB81	WGD/segmental
Pd2RMYB53	Pd2RMYB64	WGD/segmental
Pd2RMYB56	Pd2RMYB62	WGD/segmental
Pd2RMYB56	Pd2RMYB68	WGD/segmental
Pd2RMYB56	Pd2RMYB88	WGD/segmental
Pd2RMYB58	Pd2RMYB69	WGD/segmental
Pd2RMYB59	Pd2RMYB81	WGD/segmental
Pd2RMYB65	Pd2RMYB72	WGD/segmental
Pd2RMYB67	Pd2RMYB91	WGD/segmental
Pd2RMYB68	Pd2RMYB88	WGD/segmental
Pd2RMYB70	Pd2RMYB76	WGD/segmental
Pd2RMYB73	Pd2RMYB87	WGD/segmental
Pd2RMYB74	Pd2RMYB86	WGD/segmental
Pd2RMYB77	Pd2RMYB98	WGD/segmental
Pd2RMYB78	Pd2RMYB97	WGD/segmental
Pd2RMYB80	Pd2RMYB83	WGD/segmental

## Sheet: Table S4
Table S4. The main cis-acting elements of Pd2RMYB genes
	Abscisic acid responsiveness	Anaerobic induction	Auxin-responsive			Drought-inducibility	Gibberellin-responsive			Light responsive						Low-temperature responsive	MeJA-responsive		Salicylic acid responsive	Stress responsive	Wound-responsive
Gene Name	ABRE	ARE	AuxRR-core	TGA-box	TGA-element	MBS	GARE-motif	P-box	TATC-box	Box 4	G-Box	GT1-motif	MRE	GATA-motif	TCT-motif	LTR	CGTCA-motif	TGACG-motif	TCA-element	TC-rich repeats	WUN-motif
Pd2RMYB1	4	2	0	0	1	0	0	3	0	3	6	7	0	0	0	1	0	0	0	0	0
Pd2RMYB2	3	2	0	0	0	2	0	0	0	5	4	3	0	1	0	0	0	0	0	0	0
Pd2RMYB3	0	2	0	0	0	1	0	0	0	8	1	0	0	1	3	0	3	3	0	1	0
Pd2RMYB4	3	2	0	0	0	1	0	0	0	3	3	1	0	1	0	1	2	2	0	1	0
Pd2RMYB5	2	0	0	1	0	0	1	0	0	1	2	1	1	2	2	2	3	3	0	0	0
Pd2RMYB6	1	3	0	0	0	0	0	1	0	4	1	0	0	0	1	0	0	0	2	1	0
Pd2RMYB7	4	1	0	0	1	1	1	0	0	4	6	2	0	1	2	1	0	0	0	2	0
Pd2RMYB8	1	2	0	0	0	0	0	1	0	1	1	0	2	0	1	2	1	1	0	2	0
Pd2RMYB9	4	0	0	0	1	0	0	0	0	2	5	3	0	3	1	2	1	1	0	1	0
Pd2RMYB10	3	1	0	0	0	0	0	0	0	5	4	2	0	1	2	2	1	1	0	1	0
Pd2RMYB11	4	2	0	0	1	0	0	0	0	6	4	4	0	0	0	0	2	2	1	0	0
Pd2RMYB12	1	2	2	0	1	0	0	1	0	7	1	5	1	3	0	1	3	3	1	2	0
Pd2RMYB13	3	2	0	0	0	2	0	0	0	2	4	3	1	3	0	2	3	3	0	0	0
Pd2RMYB14	1	0	0	0	0	1	0	1	0	4	1	0	0	1	1	0	0	0	1	1	0
Pd2RMYB15	2	2	0	0	1	0	0	0	0	3	2	3	1	1	1	1	0	0	1	1	0
Pd2RMYB16	2	0	0	0	0	0	0	1	0	5	2	4	0	2	1	0	1	1	1	1	0
Pd2RMYB17	1	7	2	0	0	0	2	0	0	4	2	1	0	1	0	1	2	2	0	0	0
Pd2RMYB18	7	1	0	0	1	1	0	0	0	4	8	3	0	0	0	0	1	1	0	2	0
Pd2RMYB19	4	1	0	0	0	1	0	0	0	1	4	3	0	0	1	2	2	2	0	0	0
Pd2RMYB20	1	3	0	0	0	1	0	2	0	3	1	5	0	0	1	0	0	0	0	0	0
Pd2RMYB21	3	1	0	0	1	1	0	0	0	6	1	6	0	2	0	0	2	2	0	1	0
Pd2RMYB22	6	0	0	0	0	1	0	0	0	6	7	0	0	0	0	1	3	3	1	0	0
Pd2RMYB23	3	0	0	0	0	0	1	0	0	8	4	0	0	0	0	0	0	0	0	0	0
Pd2RMYB24	6	1	0	0	3	1	0	0	0	3	5	2	0	0	1	1	2	2	0	0	0
Pd2RMYB25	0	2	0	0	1	0	0	3	0	5	0	1	1	0	0	0	0	0	1	0	0
Pd2RMYB26	1	0	0	0	1	0	0	0	1	5	1	0	1	1	0	0	2	2	2	0	0
Pd2RMYB27	1	4	1	0	1	0	0	0	0	6	1	0	1	0	2	0	2	2	1	1	0
Pd2RMYB28	2	3	0	0	0	0	0	0	0	5	5	2	0	0	2	1	3	3	3	0	0
Pd2RMYB29	1	1	1	0	0	1	0	0	1	5	1	0	0	2	1	1	0	0	1	0	0
Pd2RMYB30	0	5	1	0	0	0	0	1	0	5	0	2	2	0	1	0	0	0	1	0	0
Pd2RMYB31	0	3	0	0	0	0	1	0	0	7	0	4	1	0	0	0	0	0	0	0	0
Pd2RMYB32	5	4	0	0	0	0	0	0	0	8	3	1	0	0	1	0	0	0	1	0	0
Pd2RMYB33	5	0	0	0	0	1	0	0	0	9	5	2	0	0	0	0	0	0	1	0	0
Pd2RMYB34	0	4	0	0	0	0	1	1	0	2	0	0	1	1	0	0	0	0	0	1	0
Pd2RMYB35	5	1	0	0	0	0	0	0	1	3	1	4	3	0	0	1	1	1	0	0	0
Pd2RMYB36	2	0	0	0	0	3	0	1	0	1	1	2	1	0	1	0	2	2	0	0	0
Pd2RMYB37	0	3	0	0	0	1	0	0	1	16	0	0	0	0	0	0	1	1	0	2	0
Pd2RMYB38	2	2	0	0	1	1	0	1	0	4	2	2	1	3	1	1	2	2	1	2	0
Pd2RMYB39	4	6	0	0	0	0	2	0	0	2	3	1	0	1	0	1	2	2	0	0	0
Pd2RMYB40	4	4	0	0	0	1	2	0	0	5	5	2	0	0	0	0	1	1	1	0	0
Pd2RMYB41	11	1	0	0	2	0	0	0	0	2	9	1	0	0	1	0	0	0	1	0	0
Pd2RMYB42	4	1	0	0	0	0	0	0	0	7	4	5	0	1	1	2	2	2	1	1	0
Pd2RMYB43	4	5	0	0	1	0	0	0	0	3	3	0	0	0	0	0	2	2	1	0	0
Pd2RMYB44	0	3	0	1	1	1	0	0	0	3	0	1	3	0	1	0	2	2	1	1	0
Pd2RMYB45	2	1	0	0	0	1	0	1	0	2	3	1	0	0	0	0	1	1	0	2	0
Pd2RMYB46	0	1	0	0	0	0	0	1	0	9	0	3	2	0	1	0	3	3	2	1	0
Pd2RMYB47	4	1	0	0	0	0	0	2	0	4	5	0	0	1	0	0	2	2	0	0	0
Pd2RMYB48	0	5	1	0	0	0	0	0	0	1	0	0	1	0	0	0	0	0	1	0	0
Pd2RMYB49	5	1	0	0	0	0	0	0	0	4	4	1	2	1	1	0	0	0	1	0	0
Pd2RMYB50	0	2	0	0	1	1	1	0	1	4	0	1	0	4	2	1	1	1	1	1	0
Pd2RMYB51	0	1	0	0	0	2	0	0	0	4	0	0	0	0	0	0	1	1	1	0	0
Pd2RMYB52	7	1	0	0	1	0	0	1	0	3	7	0	0	0	0	0	2	2	1	1	0
Pd2RMYB55	0	0	0	0	1	0	0	0	0	0	2	2	2	0	0	0	0	0	1	0	0
Pd2RMYB56	0	0	0	0	0	0	1	3	0	2	0	0	0	1	2	0	0	0	1	2	0
Pd2RMYB57	1	3	0	0	0	0	0	0	0	2	1	2	0	1	1	0	2	2	1	0	0
Pd2RMYB58	2	0	0	0	0	1	0	1	0	3	2	0	2	1	1	2	1	1	1	0	1
Pd2RMYB59	6	3	0	0	2	1	0	0	0	3	4	1	1	1	0	0	0	0	1	0	1
Pd2RMYB60	6	2	1	0	0	1	0	0	0	4	7	1	0	0	0	0	1	1	0	0	0
Pd2RMYB61	2	1	0	0	0	0	0	0	2	9	1	0	0	1	2	1	1	1	0	1	0
Pd2RMYB62	1	2	0	0	2	4	2	0	0	0	1	1	0	0	1	0	1	1	1	0	0
Pd2RMYB63	0	3	1	1	0	1	0	1	1	1	0	3	0	1	1	1	1	1	0	2	0
Pd2RMYB64	0	2	0	0	1	0	0	0	0	7	2	1	0	1	0	1	2	1	0	0	0
Pd2RMYB65	4	2	0	0	0	0	0	0	0	4	4	0	0	0	1	1	1	2	0	1	1
Pd2RMYB66	2	1	1	0	0	0	0	0	1	4	2	3	0	0	0	2	1	1	0	0	0
Pd2RMYB67	5	0	0	0	0	3	0	0	1	4	5	1	0	0	1	0	1	1	1	0	0
Pd2RMYB68	0	2	0	0	0	0	0	1	0	3	2	1	0	1	2	1	0	0	1	2	0
Pd2RMYB69	8	4	0	0	0	0	0	0	2	4	9	0	1	1	0	1	2	2	1	0	0
Pd2RMYB70	0	0	0	0	0	0	0	0	1	7	1	1	2	0	0	0	3	3	0	1	0
Pd2RMYB71	1	2	0	0	1	0	0	0	0	0	2	0	0	1	0	0	1	1	0	0	0
Pd2RMYB72	0	2	0	0	0	1	0	0	0	3	0	4	3	1	0	1	3	3	0	0	0
Pd2RMYB73	4	1	0	0	0	1	0	0	1	3	3	3	1	1	0	0	1	1	2	1	0
Pd2RMYB74	1	1	0	0	0	2	0	0	0	7	1	1	0	0	2	1	0	0	1	0	0
Pd2RMYB75	1	1	0	0	3	0	0	0	0	0	1	0	1	0	0	0	0	0	0	1	0
Pd2RMYB76	4	0	0	0	0	2	0	0	0	2	5	0	1	0	1	0	1	1	0	1	0
Pd2RMYB77	1	4	0	0	0	2	1	0	0	1	1	2	0	1	0	2	0	0	1	1	0
Pd2RMYB78	0	3	0	0	1	0	0	0	0	0	0	4	0	2	0	0	0	0	1	1	0
Pd2RMYB79	2	1	1	0	0	0	0	0	0	3	2	1	0	2	1	1	1	1	1	1	0
Pd2RMYB80	1	4	0	0	0	1	0	0	0	0	1	1	0	0	0	0	1	1	0	1	0
Pd2RMYB81	9	3	0	0	1	1	1	1	0	4	9	4	0	0	0	0	3	3	0	1	0
Pd2RMYB82	3	0	0	0	0	0	0	1	1	2	3	1	0	0	0	0	0	0	0	0	0
Pd2RMYB83	1	4	0	0	0	1	0	0	0	0	1	1	0	0	0	0	1	1	0	1	0
Pd2RMYB84	2	2	0	0	0	3	0	0	0	3	3	1	0	2	1	1	2	2	0	0	0
Pd2RMYB85	2	0	0	0	0	0	1	0	0	4	2	1	0	0	0	0	2	2	1	0	0
Pd2RMYB86	2	3	0	0	0	1	0	0	1	8	1	1	0	1	1	0	0	0	1	3	0
Pd2RMYB87	0	2	0	0	0	0	0	0	1	7	0	5	0	1	0	1	0	0	1	2	0
Pd2RMYB88	1	7	0	0	0	0	1	0	0	2	1	1	0	1	0	0	1	1	3	0	0
Pd2RMYB89	1	3	0	0	0	0	0	0	1	6	3	1	0	1	0	0	0	0	0	0	0
Pd2RMYB90	0	2	0	0	0	0	0	0	0	5	0	3	4	0	1	0	1	1	0	0	0
Pd2RMYB91	2	4	0	0	1	1	0	0	0	3	3	0	0	0	0	2	1	1	0	0	0
Pd2RMYB92	2	3	0	0	0	0	0	0	0	3	1	1	0	2	4	0	0	0	0	1	0
Pd2RMYB93	2	7	0	0	0	1	1	0	0	1	2	4	1	0	1	5	1	1	0	0	0
Pd2RMYB94	2	1	0	0	0	1	1	0	0	7	2	0	2	0	0	0	0	0	1	2	0
Pd2RMYB95	2	0	1	0	0	0	0	1	0	1	2	2	0	1	2	0	1	1	1	0	0
Pd2RMYB96	6	1	0	0	0	1	0	0	0	13	6	0	1	0	1	0	0	0	0	0	0
Pd2RMYB97	0	4	0	0	0	1	1	0	0	3	0	0	0	3	0	1	0	0	0	0	0
Pd2RMYB98	0	0	1	0	0	2	1	1	0	5	0	2	0	0	1	1	0	0	1	1	0
Pd2RMYB99	4	3	0	1	0	1	0	1	0	3	3	0	0	1	0	0	2	2	2	0	0
Pd2RMYB100	0	1	0	0	0	0	0	0	0	3	0	1	1	0	1	1	2	2	1	0	0
Total	231	196	14	4	34	61	23	33	18	391	243	156	49	68	63	55	106	106	59	57	3

## Sheet: Table S5
Table S5. GO function annotation of Pd2RMYB
Class	GO_Name	GO_ID	P_value	HitsGenesCountsInSelectedSet	HitsGenesCountsInBackground	AllGenesCountsInSelectedSet	AllGenesCountsInBackground	GenesOfSelectedSetInGOterm
MF	organic cyclic compound binding	GO:0097159	0	66	2965	69	11943	EVM19507.T1,EVM12097.T1,EVM25452.T1,EVM31193.T1,EVM29109.T1,EVM02295.T1,EVM24415.T1,EVM21645.T1,EVM12092.T1,EVM22988.T1,EVM23622.T1,EVM20463.T1,EVM28102.T1,EVM04303.T1,EVM25918.T1,EVM10505.T1,EVM15535.T1,EVM05107.T1,EVM21529.T1,EVM13182.T2,EVM14261.T1,EVM03386.T2,EVM23996.T1,EVM04706.T1,EVM00877.T1,EVM19384.T1,EVM11990.T1,EVM22444.T1,EVM05303.T1,EVM10026.T1,EVM23450.T1,EVM16399.T1,EVM05705.T1,EVM…
MF	transcription regulator activity	GO:0140110	0	66	1746	69	11943	EVM19507.T1,EVM12097.T1,EVM25452.T1,EVM31193.T1,EVM29109.T1,EVM02295.T1,EVM24415.T1,EVM21645.T1,EVM12092.T1,EVM22988.T1,EVM23622.T1,EVM20463.T1,EVM28102.T1,EVM04303.T1,EVM25918.T1,EVM10505.T1,EVM15535.T1,EVM05107.T1,EVM21529.T1,EVM13182.T2,EVM14261.T1,EVM03386.T2,EVM23996.T1,EVM04706.T1,EVM00877.T1,EVM19384.T1,EVM11990.T1,EVM22444.T1,EVM05303.T1,EVM10026.T1,EVM23450.T1,EVM16399.T1,EVM05705.T1,EVM…
MF	transcription cis-regulatory region binding	GO:0000976	0	63	485	69	11943	EVM19507.T1,EVM12097.T1,EVM25452.T1,EVM31193.T1,EVM29109.T1,EVM02295.T1,EVM24415.T1,EVM21645.T1,EVM12092.T1,EVM22988.T1,EVM23622.T1,EVM20463.T1,EVM28102.T1,EVM04303.T1,EVM25918.T1,EVM10505.T1,EVM15535.T1,EVM05107.T1,EVM21529.T1,EVM13182.T2,EVM14261.T1,EVM03386.T2,EVM23996.T1,EVM04706.T1,EVM00877.T1,EVM19384.T1,EVM11990.T1,EVM22444.T1,EVM05303.T1,EVM10026.T1,EVM23450.T1,EVM16399.T1,EVM05705.T1,EVM…
MF	DNA-binding transcription factor activity, RNA polymerase II-specific	GO:0000981	0	63	216	69	11943	EVM19507.T1,EVM12097.T1,EVM25452.T1,EVM31193.T1,EVM29109.T1,EVM02295.T1,EVM24415.T1,EVM21645.T1,EVM12092.T1,EVM22988.T1,EVM23622.T1,EVM20463.T1,EVM28102.T1,EVM04303.T1,EVM25918.T1,EVM10505.T1,EVM15535.T1,EVM05107.T1,EVM21529.T1,EVM13182.T2,EVM14261.T1,EVM03386.T2,EVM23996.T1,EVM04706.T1,EVM00877.T1,EVM19384.T1,EVM11990.T1,EVM22444.T1,EVM05303.T1,EVM10026.T1,EVM23450.T1,EVM16399.T1,EVM05705.T1,EVM…
MF	nucleic acid binding	GO:0003676	0	66	2521	69	11943	EVM19507.T1,EVM12097.T1,EVM25452.T1,EVM31193.T1,EVM29109.T1,EVM02295.T1,EVM24415.T1,EVM21645.T1,EVM12092.T1,EVM22988.T1,EVM23622.T1,EVM20463.T1,EVM28102.T1,EVM04303.T1,EVM25918.T1,EVM10505.T1,EVM15535.T1,EVM05107.T1,EVM21529.T1,EVM13182.T2,EVM14261.T1,EVM03386.T2,EVM23996.T1,EVM04706.T1,EVM00877.T1,EVM19384.T1,EVM11990.T1,EVM22444.T1,EVM05303.T1,EVM10026.T1,EVM23450.T1,EVM16399.T1,EVM05705.T1,EVM…
MF	obsolete transcription factor activity, protein binding	GO:0000988	0	63	146	69	11943	EVM19507.T1,EVM12097.T1,EVM25452.T1,EVM31193.T1,EVM29109.T1,EVM02295.T1,EVM24415.T1,EVM21645.T1,EVM12092.T1,EVM22988.T1,EVM23622.T1,EVM20463.T1,EVM28102.T1,EVM04303.T1,EVM25918.T1,EVM10505.T1,EVM15535.T1,EVM05107.T1,EVM21529.T1,EVM13182.T2,EVM14261.T1,EVM03386.T2,EVM23996.T1,EVM04706.T1,EVM00877.T1,EVM19384.T1,EVM11990.T1,EVM22444.T1,EVM05303.T1,EVM10026.T1,EVM23450.T1,EVM16399.T1,EVM05705.T1,EVM…
MF	DNA binding	GO:0003677	0	66	1312	69	11943	EVM19507.T1,EVM12097.T1,EVM25452.T1,EVM31193.T1,EVM29109.T1,EVM02295.T1,EVM24415.T1,EVM21645.T1,EVM12092.T1,EVM22988.T1,EVM23622.T1,EVM20463.T1,EVM28102.T1,EVM04303.T1,EVM25918.T1,EVM10505.T1,EVM15535.T1,EVM05107.T1,EVM21529.T1,EVM13182.T2,EVM14261.T1,EVM03386.T2,EVM23996.T1,EVM04706.T1,EVM00877.T1,EVM19384.T1,EVM11990.T1,EVM22444.T1,EVM05303.T1,EVM10026.T1,EVM23450.T1,EVM16399.T1,EVM05705.T1,EVM…
MF	double-stranded DNA binding	GO:0003690	0	63	605	69	11943	EVM19507.T1,EVM12097.T1,EVM25452.T1,EVM31193.T1,EVM29109.T1,EVM02295.T1,EVM24415.T1,EVM21645.T1,EVM12092.T1,EVM22988.T1,EVM23622.T1,EVM20463.T1,EVM28102.T1,EVM04303.T1,EVM25918.T1,EVM10505.T1,EVM15535.T1,EVM05107.T1,EVM21529.T1,EVM13182.T2,EVM14261.T1,EVM03386.T2,EVM23996.T1,EVM04706.T1,EVM00877.T1,EVM19384.T1,EVM11990.T1,EVM22444.T1,EVM05303.T1,EVM10026.T1,EVM23450.T1,EVM16399.T1,EVM05705.T1,EVM…
MF	transcription regulatory region nucleic acid binding	GO:0001067	0	63	485	69	11943	EVM19507.T1,EVM12097.T1,EVM25452.T1,EVM31193.T1,EVM29109.T1,EVM02295.T1,EVM24415.T1,EVM21645.T1,EVM12092.T1,EVM22988.T1,EVM23622.T1,EVM20463.T1,EVM28102.T1,EVM04303.T1,EVM25918.T1,EVM10505.T1,EVM15535.T1,EVM05107.T1,EVM21529.T1,EVM13182.T2,EVM14261.T1,EVM03386.T2,EVM23996.T1,EVM04706.T1,EVM00877.T1,EVM19384.T1,EVM11990.T1,EVM22444.T1,EVM05303.T1,EVM10026.T1,EVM23450.T1,EVM16399.T1,EVM05705.T1,EVM…
CC	nucleus	GO:0005634	0	69	4545	69	13738	EVM19507.T1,EVM12097.T1,EVM25452.T1,EVM31193.T1,EVM29109.T1,EVM02295.T1,EVM06109.T1,EVM24415.T1,EVM21645.T1,EVM12092.T1,EVM22988.T1,EVM02486.T1,EVM23622.T1,EVM20463.T1,EVM28102.T1,EVM04303.T1,EVM25918.T1,EVM10505.T1,EVM15535.T1,EVM05107.T1,EVM21529.T1,EVM13182.T2,EVM14261.T1,EVM03386.T2,EVM23996.T1,EVM04706.T1,EVM00877.T1,EVM19384.T1,EVM11990.T1,EVM22444.T1,EVM05303.T1,EVM10026.T1,EVM23450.T1,EVM…
CC	intracellular membrane-bounded organelle	GO:0043231	1.0454392906922294E-10	69	9856	69	13738	EVM19507.T1,EVM12097.T1,EVM25452.T1,EVM31193.T1,EVM29109.T1,EVM02295.T1,EVM06109.T1,EVM24415.T1,EVM21645.T1,EVM12092.T1,EVM22988.T1,EVM02486.T1,EVM23622.T1,EVM20463.T1,EVM28102.T1,EVM04303.T1,EVM25918.T1,EVM10505.T1,EVM15535.T1,EVM05107.T1,EVM21529.T1,EVM13182.T2,EVM14261.T1,EVM03386.T2,EVM23996.T1,EVM04706.T1,EVM00877.T1,EVM19384.T1,EVM11990.T1,EVM22444.T1,EVM05303.T1,EVM10026.T1,EVM23450.T1,EVM…
CC	membrane-bounded organelle	GO:0043227	1.515527703332964E-10	69	9909	69	13738	EVM19507.T1,EVM12097.T1,EVM25452.T1,EVM31193.T1,EVM29109.T1,EVM02295.T1,EVM06109.T1,EVM24415.T1,EVM21645.T1,EVM12092.T1,EVM22988.T1,EVM02486.T1,EVM23622.T1,EVM20463.T1,EVM28102.T1,EVM04303.T1,EVM25918.T1,EVM10505.T1,EVM15535.T1,EVM05107.T1,EVM21529.T1,EVM13182.T2,EVM14261.T1,EVM03386.T2,EVM23996.T1,EVM04706.T1,EVM00877.T1,EVM19384.T1,EVM11990.T1,EVM22444.T1,EVM05303.T1,EVM10026.T1,EVM23450.T1,EVM…
CC	intracellular organelle	GO:0043229	1.1396169563582248E-9	69	10202	69	13738	EVM19507.T1,EVM12097.T1,EVM25452.T1,EVM31193.T1,EVM29109.T1,EVM02295.T1,EVM06109.T1,EVM24415.T1,EVM21645.T1,EVM12092.T1,EVM22988.T1,EVM02486.T1,EVM23622.T1,EVM20463.T1,EVM28102.T1,EVM04303.T1,EVM25918.T1,EVM10505.T1,EVM15535.T1,EVM05107.T1,EVM21529.T1,EVM13182.T2,EVM14261.T1,EVM03386.T2,EVM23996.T1,EVM04706.T1,EVM00877.T1,EVM19384.T1,EVM11990.T1,EVM22444.T1,EVM05303.T1,EVM10026.T1,EVM23450.T1,EVM…
CC	organelle	GO:0043226	1.504349311787223E-9	69	10243	69	13738	EVM19507.T1,EVM12097.T1,EVM25452.T1,EVM31193.T1,EVM29109.T1,EVM02295.T1,EVM06109.T1,EVM24415.T1,EVM21645.T1,EVM12092.T1,EVM22988.T1,EVM02486.T1,EVM23622.T1,EVM20463.T1,EVM28102.T1,EVM04303.T1,EVM25918.T1,EVM10505.T1,EVM15535.T1,EVM05107.T1,EVM21529.T1,EVM13182.T2,EVM14261.T1,EVM03386.T2,EVM23996.T1,EVM04706.T1,EVM00877.T1,EVM19384.T1,EVM11990.T1,EVM22444.T1,EVM05303.T1,EVM10026.T1,EVM23450.T1,EVM…
CC	obsolete intracellular part	GO:0044424	1.3061666229052804E-5	69	11677	69	13738	EVM19507.T1,EVM12097.T1,EVM25452.T1,EVM31193.T1,EVM29109.T1,EVM02295.T1,EVM06109.T1,EVM24415.T1,EVM21645.T1,EVM12092.T1,EVM22988.T1,EVM02486.T1,EVM23622.T1,EVM20463.T1,EVM28102.T1,EVM04303.T1,EVM25918.T1,EVM10505.T1,EVM15535.T1,EVM05107.T1,EVM21529.T1,EVM13182.T2,EVM14261.T1,EVM03386.T2,EVM23996.T1,EVM04706.T1,EVM00877.T1,EVM19384.T1,EVM11990.T1,EVM22444.T1,EVM05303.T1,EVM10026.T1,EVM23450.T1,EVM…
CC	intracellular anatomical structure	GO:0005622	1.6549045448455146E-5	69	11717	69	13738	EVM19507.T1,EVM12097.T1,EVM25452.T1,EVM31193.T1,EVM29109.T1,EVM02295.T1,EVM06109.T1,EVM24415.T1,EVM21645.T1,EVM12092.T1,EVM22988.T1,EVM02486.T1,EVM23622.T1,EVM20463.T1,EVM28102.T1,EVM04303.T1,EVM25918.T1,EVM10505.T1,EVM15535.T1,EVM05107.T1,EVM21529.T1,EVM13182.T2,EVM14261.T1,EVM03386.T2,EVM23996.T1,EVM04706.T1,EVM00877.T1,EVM19384.T1,EVM11990.T1,EVM22444.T1,EVM05303.T1,EVM10026.T1,EVM23450.T1,EVM…
BP	response to xenobiotic stimulus	GO:0009410	0	33	1186	69	13913	EVM19507.T1,EVM12097.T1,EVM25452.T1,EVM31193.T1,EVM29109.T1,EVM02295.T1,EVM06109.T1,EVM24415.T1,EVM21645.T1,EVM12092.T1,EVM22988.T1,EVM02486.T1,EVM23622.T1,EVM20463.T1,EVM28102.T1,EVM04303.T1,EVM25918.T1,EVM10505.T1,EVM15535.T1,EVM05107.T1,EVM21529.T1,EVM13182.T2,EVM14261.T1,EVM03386.T2,EVM23996.T1,EVM04706.T1,EVM00877.T1,EVM19384.T1,EVM11990.T1,EVM22444.T1,EVM05303.T1,EVM10026.T1,EVM23450.T1,EVM…
BP	regulation of primary metabolic process	GO:0080090	0	69	3116	69	13913	EVM19507.T1,EVM12097.T1,EVM25452.T1,EVM31193.T1,EVM29109.T1,EVM02295.T1,EVM06109.T1,EVM24415.T1,EVM21645.T1,EVM12092.T1,EVM22988.T1,EVM02486.T1,EVM23622.T1,EVM20463.T1,EVM28102.T1,EVM04303.T1,EVM25918.T1,EVM10505.T1,EVM15535.T1,EVM05107.T1,EVM21529.T1,EVM13182.T2,EVM14261.T1,EVM03386.T2,EVM23996.T1,EVM04706.T1,EVM00877.T1,EVM19384.T1,EVM11990.T1,EVM22444.T1,EVM05303.T1,EVM10026.T1,EVM23450.T1,EVM…
BP	regulation of gene expression	GO:0010468	0	69	2819	69	13913	EVM19507.T1,EVM21645.T1,EVM23622.T1,EVM28102.T1,EVM04303.T1,EVM23996.T1,EVM04706.T1,EVM05303.T1,EVM10026.T1,EVM16399.T1,EVM10679.T1,EVM11033.T1,EVM08759.T1,EVM04761.T1,EVM13939.T1,EVM15679.T1,EVM24082.T1,EVM28977.T1,EVM31016.T1,EVM14632.T1,EVM16331.T1,EVM26249.T1,EVM18955.T1,
BP	response to auxin	GO:0009733	0	23	465	69	13913	EVM19507.T1,EVM21645.T1,EVM23622.T1,EVM04303.T1,EVM23996.T1,EVM04706.T1,EVM10026.T1,EVM16399.T1,EVM10679.T1,EVM11033.T1,EVM04761.T1,EVM13939.T1,EVM24082.T1,EVM28977.T1,EVM31016.T1,EVM14632.T1,EVM16331.T1,EVM26249.T1,
BP	salicylic acid mediated signaling pathway	GO:0009863	0	18	100	69	13913	EVM19507.T1,EVM21645.T1,EVM23622.T1,EVM04303.T1,EVM21529.T1,EVM23996.T1,EVM04706.T1,EVM10026.T1,EVM16399.T1,EVM10679.T1,EVM11033.T1,EVM04761.T1,EVM13939.T1,EVM24082.T1,EVM28977.T1,EVM31016.T1,EVM14632.T1,EVM16331.T1,EVM26249.T1,EVM19173.T1,
BP	jasmonic acid mediated signaling pathway	GO:0009867	0	20	178	69	13913	EVM19507.T1,EVM12097.T1,EVM25452.T1,EVM31193.T1,EVM29109.T1,EVM02295.T1,EVM06109.T1,EVM24415.T1,EVM21645.T1,EVM12092.T1,EVM22988.T1,EVM02486.T1,EVM23622.T1,EVM20463.T1,EVM28102.T1,EVM04303.T1,EVM25918.T1,EVM10505.T1,EVM15535.T1,EVM05107.T1,EVM21529.T1,EVM13182.T2,EVM14261.T1,EVM03386.T2,EVM23996.T1,EVM04706.T1,EVM00877.T1,EVM19384.T1,EVM11990.T1,EVM22444.T1,EVM05303.T1,EVM10026.T1,EVM23450.T1,EVM…
BP	biosynthetic process	GO:0009058	0	69	5778	69	13913	EVM19507.T1,EVM21645.T1,EVM23622.T1,EVM28102.T1,EVM04303.T1,EVM14261.T1,EVM03386.T2,EVM23996.T1,EVM04706.T1,EVM11990.T1,EVM10026.T1,EVM16399.T1,EVM08491.T1,EVM10323.T1,EVM10679.T1,EVM18046.T1,EVM06111.T2,EVM11033.T1,EVM08759.T1,EVM04761.T1,EVM13939.T1,EVM24082.T1,EVM28977.T1,EVM31016.T1,EVM01775.T1,EVM14632.T1,EVM16331.T1,EVM26249.T1,EVM14971.T1,EVM30315.T1,EVM17839.T1,EVM19173.T1,
BP	response to salicylic acid	GO:0009751	1.1102230246251565E-16	32	298	69	13913	EVM19507.T1,EVM21645.T1,EVM23622.T1,EVM28102.T1,EVM04303.T1,EVM23996.T1,EVM04706.T1,EVM10026.T1,EVM16399.T1,EVM10323.T1,EVM10679.T1,EVM18046.T1,EVM11033.T1,EVM08759.T1,EVM04761.T1,EVM13939.T1,EVM24082.T1,EVM28977.T1,EVM31016.T1,EVM01775.T1,EVM14632.T1,EVM16331.T1,EVM26249.T1,
BP	response to cadmium ion	GO:0046686	1.1102230246251565E-16	23	382	69	13913	EVM19507.T1,EVM21645.T1,EVM23622.T1,EVM28102.T1,EVM04303.T1,EVM21529.T1,EVM14261.T1,EVM03386.T2,EVM23996.T1,EVM04706.T1,EVM19384.T1,EVM11990.T1,EVM05303.T1,EVM10026.T1,EVM16399.T1,EVM05705.T1,EVM08491.T1,EVM10323.T1,EVM10679.T1,EVM18046.T1,EVM02078.T1,EVM06111.T2,EVM11033.T1,EVM08759.T1,EVM04761.T1,EVM13939.T1,EVM15679.T1,EVM24082.T1,EVM28977.T1,EVM31016.T1,EVM01775.T1,EVM14632.T1,EVM16331.T1,EVM…
BP	response to hormone	GO:0009725	2.3314683517128287E-15	39	2107	69	13913	EVM19507.T1,EVM21645.T1,EVM23622.T1,EVM28102.T1,EVM04303.T1,EVM23996.T1,EVM04706.T1,EVM19384.T1,EVM05303.T1,EVM10026.T1,EVM16399.T1,EVM10679.T1,EVM11033.T1,EVM08759.T1,EVM04761.T1,EVM13939.T1,EVM15679.T1,EVM24082.T1,EVM28977.T1,EVM31016.T1,EVM14632.T1,EVM16331.T1,EVM26249.T1,EVM18955.T1,
BP	response to salt stress	GO:0009651	2.3092638912203256E-14	24	719	69	13913	EVM19507.T1,EVM21645.T1,EVM23622.T1,EVM04303.T1,EVM23996.T1,EVM04706.T1,EVM10026.T1,EVM16399.T1,EVM10679.T1,EVM11033.T1,EVM04761.T1,EVM13939.T1,EVM15679.T1,EVM24082.T1,EVM28977.T1,EVM31016.T1,EVM14632.T1,EVM16331.T1,EVM26249.T1,EVM18955.T1,
BP	response to water deprivation	GO:0009414	6.827871601444713E-14	20	472	69	13913	EVM19507.T1,EVM02295.T1,EVM21645.T1,EVM23622.T1,EVM28102.T1,EVM04303.T1,EVM23996.T1,EVM04706.T1,EVM19384.T1,EVM05303.T1,EVM10026.T1,EVM16399.T1,EVM10679.T1,EVM11033.T1,EVM08759.T1,EVM04761.T1,EVM13939.T1,EVM15679.T1,EVM24082.T1,EVM28977.T1,EVM31016.T1,EVM14632.T1,EVM16331.T1,EVM26249.T1,EVM18955.T1,
BP	response to osmotic stress	GO:0006970	9.259260025373806E-14	25	847	69	13913	EVM19507.T1,EVM21645.T1,EVM23622.T1,EVM04303.T1,EVM03386.T2,EVM23996.T1,EVM04706.T1,EVM19384.T1,EVM10026.T1,EVM16399.T1,EVM05705.T1,EVM10679.T1,EVM06111.T2,EVM11033.T1,EVM04761.T1,EVM13939.T1,EVM15679.T1,EVM24082.T1,EVM28977.T1,EVM31016.T1,EVM14632.T1,EVM16331.T1,EVM26249.T1,EVM18955.T1,
BP	response to abscisic acid	GO:0009737	1.2945200467129325E-13	24	778	69	13913	EVM19507.T1,EVM02295.T1,EVM21645.T1,EVM23622.T1,EVM04303.T1,EVM23996.T1,EVM04706.T1,EVM10026.T1,EVM16399.T1,EVM10323.T1,EVM10679.T1,EVM11033.T1,EVM04761.T1,EVM13939.T1,EVM24082.T1,EVM28977.T1,EVM31016.T1,EVM14632.T1,EVM16331.T1,EVM26249.T1,
